# Supplementary material for: Resource Consumption and Remuneration Aspects in Navigated Screw Fixation Procedures with or without Additional Sacroplasty for Fragility Fractures of the Sacrum—A Prospective Clinical Study
Source: MDPI journal article supplement (doi:10.3390/jcm11206136), 2022-10-18
Supplement: s1 [file s1]

Title: Resource consumption and remuneration aspects in navigated screw fixation procedures with or without additional sacroplasty for fragility fractures of the sacrum – a prospective clinical study  
Journal: Journal of Clinical Medicine  
Authors: Horst Balling, MD<sup>1,2,3</sup>, Boris Michael Holzapfel, MD, PhD<sup>3</sup>, Wolfgang Böcker, MD<sup>3</sup>, Joerg Arnholdt, MD<sup>3</sup>.  
Affiliation: <sup>1</sup>Department for Spine Surgery and Traumatology, Orthopaedische Fachklinik Schwarzach, Dekan-Graf-Str. 2-6, 94374 Schwarzach, Germany; <sup>2</sup>Center for Spine Surgery, Neckar-Odenwald-Kliniken gGmbH, Buchen, Dr.-Konrad-Adenauer-Str. 37, 74722 Buchen, Germany, <sup>3</sup>Department of Orthopaedics and Trauma Surgery, Musculoskeletal University Center Munich (MUM), University Hospital, LMU Munich, Marchioninistr. 15, 81377, Munich, Germany  
E-mail: horst.balling@neckar-odenwald-kliniken.de; horstballing@yahoo.de

**Online Resource 1** Data on baseline conditions and study results (patients' gender, age, fracture sites, fracture morphology, concomitant injuries of anterior pelvic ring, surgical duration, 3D-/2D-radiation dose, fluoroscopy time, cement amount applied, implant costs, and remuneration)

| patient | group   | age (years) | gender | sacral fracture sites (S1+S2) | transalar transforaminal central | anterior pelvic ring fracture | surgical duration (minutes) | 3D-radiation dose (mGy <sup>cm</sup> ) | 2D-radiation dose (mGy <sup>cm</sup> ) | fluoroscopy time (sec) | cement amount (cc) | implant costs (€/surgery) | reimbursement (€/surgery) |
|---------|---------|-------------|--------|-------------------------------|----------------------------------|-------------------------------|-----------------------------|----------------------------------------|----------------------------------------|------------------------|--------------------|---------------------------|---------------------------|
| 1       | NSF     | 90          | f      | 1+0                           | 1                                | yes                           | 68                          | 2058.95                                | 818.04                                 | 29.11                  |                    | 166.30                    | 6006.96                   |
| 2       | NSF     | 71          | f      | 2+0                           | 2                                | no                            | 76                          | 1269.46                                | 1070.15                                | 25.78                  |                    | 169.20                    | 3507.54                   |
| 3       | NSF+ASP | 75          | f      | 1+0                           | 1                                | yes                           | 81                          | 1269.46                                | 4288.81                                | 84.42                  | 1.5                | 514.69                    | 7253.05                   |
| 4       | NSF+ASP | 74          | f      | 2+0                           | 2                                | yes                           | 118                         | 1822.89                                | 4295.81                                | 56.84                  | 1.2                | 663.89                    | 6402.97                   |
| 5       | NSF+ASP | 79          | f      | 2+0                           | 2                                | no                            | 93                          | 2058.95                                | 24799.23                               | 60.5                   | 1.2                | 522.59                    | 6691.39                   |
| 6       | NSF     | 77          | f      | 1+0                           | 1                                | no                            | 78                          | 900.50                                 | 9784.50                                | 27.14                  |                    | 79.60                     | 5352.50                   |
| 7       | NSF     | 85          | f      | 2+0                           | 2                                | yes                           | 139                         | 1080.60                                | 8643.38                                | 55.51                  |                    | 251.70                    | 6204.72                   |
| 8       | NSF+ASP | 65          | f      | 2+0                           | 2                                | yes                           | 136                         | 450.25                                 | 5017.14                                | 41.87                  | 3.5                | 653.60                    | 5555.82                   |
| 9       | NSF+ASP | 77          | f      | 2+2                           | 4                                | no                            | 211                         | 899.35                                 | 19780.97                               | 53.67                  | 6                  | 759.32                    | 5555.82                   |
| 10      | NSF     | 80          | f      | 2+0                           | 1 1                              | yes                           | 120                         | 720.40                                 | 6554.71                                | 32.51                  |                    | 173.40                    | 5138.67                   |
| 11      | NSF     | 73          | m      | 1+0                           |                                  | 1 no                          | 107                         | 720.40                                 | 7355.94                                | 34.02                  |                    | 173.40                    | 6448.83                   |
| 12      | NSF     | 86          | f      | 2+0                           | 2                                | no                            | 85                          | 720.40                                 | 2846.82                                | 23.05                  |                    | 173.40                    | 6473.55                   |
| 13      | NSF     | 66          | f      | 2+0                           | 2                                | yes                           | 80                          | 720.40                                 | 6446.62                                | 25.45                  |                    | 169.20                    | 5555.82                   |
| 14      | NSF     | 58          | f      | 1+0                           | 1                                | yes                           | 47                          | 530.28                                 | 3292.94                                | 15.69                  |                    | 156.30                    | 5642.76                   |
| 15      | NSF     | 36          | f      | 2+0                           | 1 1                              | yes                           | 123                         | 2058.03                                | 25332.20                               | 46.20                  |                    | 172.00                    | 5642.76                   |
| 16      | NSF+ASP | 66          | m      | 2+0                           | 2                                | yes                           | 110                         | 1125.63                                | 6368.78                                | 36.96                  | 3                  | 557.20                    | 6742.62                   |
| 17      | NSF+ASP | 69          | f      | 2+0                           | 2                                | no                            | 112                         | 840.47                                 | 6700.20                                | 35.18                  | 1.5                | 523.29                    | 5642.76                   |
| 18      | NSF+ASP | 71          | f      | 2+0                           | 2                                | yes                           | 109                         | 870.49                                 | 3627.76                                | 26.61                  | 1.5                | 519.69                    | 10807.32                  |
| 19      | NSF+ASP | 84          | f      | 2+0                           | 2                                | no                            | 121                         | 840.47                                 | 8733.32                                | 44.12                  | 3                  | 574.70                    | 8381.29                   |
| 20      | NSF+ASP | 85          | f      | 1+0                           | 1                                | yes                           | 113                         | 839.55                                 | 6635.32                                | 33.38                  | 1.5                | 520.49                    | 10807.32                  |
| 21      | NSF+ASP | 83          | f      | 2+0                           | 2                                | yes                           | 100                         | 870.49                                 | 3458.19                                | 33.45                  | 3                  | 558.60                    | 10807.32                  |
| 22      | NSF     | 73          | f      | 1+0                           | 1                                | no                            | 58                          | 1714.64                                | 7197.66                                | 29.39                  |                    | 156.30                    | 5642.76                   |
| 23      | NSF     | 72          | f      | 2+0                           | 2                                | yes                           | 49                          | 570.32                                 | 3118.13                                | 22.68                  |                    | 173.40                    | 7408.91                   |
| 24      | NSF+ASP | 78          | f      | 1+0                           | 1                                | no                            | 105                         | 630.35                                 | 2845.33                                | 36.88                  | 1.5                | 520.49                    | 10807.32                  |
| 25      | NSF     | 68          | m      | 2+0                           | 2                                | yes                           | 101                         | 900.50                                 | 7417.13                                | 36.63                  |                    | 173.40                    | 5642.76                   |

Title: Resource consumption and remuneration aspects in navigated screw fixation procedures with or without additional sacroplasty for fragility fractures of the sacrum – a prospective clinical study

Journal: Journal of Clinical Medicine

Authors: Horst Balling, MD<sup>1,2,3</sup>, Boris Michael Holzapfel, MD, PhD<sup>3</sup>, Wolfgang Böcker, MD<sup>3</sup>, Joerg Arnholdt, MD<sup>3</sup>.

Affiliation: <sup>1</sup>Department for Spine Surgery and Traumatology, Orthopaedische Fachklinik Schwarzach, Dekan-Graf-Str. 2-6, 94374 Schwarzach, Germany;

<sup>2</sup>Center for Spine Surgery, Neckar-Odenwald-Kliniken gGmbH, Buchen, Dr.-Konrad-Adenauer-Str. 37, 74722 Buchen, Germany, <sup>3</sup>Department of Orthopaedics and Trauma Surgery, Musculoskeletal University Center Munich (MUM), University Hospital, LMU Munich, Marchioninstr. 15, 81377, Munich, Germany

E-mail: horst.balling@neckar-odenwald-kliniken.de; horstballing@yahoo.de

|    |         |    |   |     |   |   |     |     |         |          |       |     |         |          |
|----|---------|----|---|-----|---|---|-----|-----|---------|----------|-------|-----|---------|----------|
| 26 | NSF+ASP | 55 | f | 2+2 | 4 |   | no  | 135 | 300.17  | 6510.23  | 55.61 | 6   | 641.02  | 6569.60  |
| 27 | NSF+ASP | 86 | f | 2+2 | 4 |   | no  | 133 | 262.46  | 6843.39  | 71.38 | 3   | 574.70  | 11778.40 |
| 28 | NSF+ASP | 76 | f | 2+0 | 2 |   | yes | 100 | 262.65  | 3792.72  | 37.46 | 3   | 574.70  | 11778.40 |
| 29 | NSF     | 73 | f | 2+0 |   | 2 | no  | 52  | 1372.64 | 5363.93  | 20.89 |     | 173.40  | 5775.26  |
| 30 | NSF+ASP | 76 | f | 2+0 | 2 |   | no  | 111 | 243.89  | 4964.16  | 49.48 | 3   | 558.60  | 7676.47  |
| 31 | NSF+ASP | 74 | f | 2+2 | 4 |   | no  | 115 | 262.65  | 2497.26  | 31.48 | 3   | 575.40  | 8913.60  |
| 32 | NSF+ASP | 77 | f | 1+0 | 1 |   | no  | 98  | 243.89  | 3691.61  | 31.62 | 3   | 558.60  | 6569.60  |
| 33 | NSF+ASP | 86 | f | 0+2 | 2 |   | yes | 105 | 1822.89 | 13374.70 | 47.74 | 1.5 | 558.60  | 11778.40 |
| 34 | NSF     | 89 | f | 1+0 | 1 |   | yes | 48  | 568.28  | 6458.80  | 26.44 |     | 158.10  | 5775.26  |
| 35 | NSF     | 80 | f | 2+2 | 4 |   | no  | 152 | 155.54  | 6798.43  | 54.85 |     | 255.10  | 6569.60  |
| 36 | NSF     | 90 | f | 2+2 | 4 |   | yes | 91  | 167.97  | 2537.18  | 32.61 |     | 172.00  | 6891.81  |
| 37 | NSF     | 71 | f | 2+2 | 4 |   | no  | 136 | 800.70  | 9762.73  | 60.35 |     | 258.00  | 7367.33  |
| 38 | NSF     | 81 | m | 2+0 | 2 |   | no  | 105 | 225.13  | 5096.97  | 44.75 |     | 172.70  | 6803.86  |
| 39 | NSF     | 86 | f | 1+0 | 1 |   | no  | 97  | 119.96  | 6105.66  | 46.82 |     | 173.40  | 8942.43  |
| 40 | NSF     | 66 | f | 2+2 | 4 |   | no  | 128 | 118.71  | 3041.91  | 30.21 |     | 172.00  | 7008.19  |
| 41 | NSF     | 78 | f | 2+2 |   | 4 | no  | 122 | 187.60  | 5404.84  | 56.83 |     | 245.20  | 5020.99  |
| 42 | NSF+ASP | 86 | f | 2+2 | 4 |   | no  | 176 | 126.07  | 4005.34  | 44.49 | 7   | 764.93  | 7008.19  |
| 43 | NSF     | 64 | f | 2+2 |   | 4 | no  | 167 | 142.48  | 5637.84  | 41.89 |     | 258.00  | 7008.19  |
| 44 | NSF+ASP | 69 | f | 1+1 | 2 |   | no  | 132 | 94.64   | 8415.65  | 53.31 | 3   | 608.49  | 7008.19  |
| 45 | NSF     | 70 | f | 2+2 | 2 | 2 | no  | 131 | 2745.27 | 6066.52  | 15.67 |     | 421.48  | 4924.68  |
| 46 | NSF     | 84 | f | 1+0 | 1 |   | yes | 63  | 225.13  | 1186.75  | 7.4   |     | 266.87  | 13144.47 |
| 47 | NSF     | 82 | f | 2+2 | 4 |   | yes | 81  | 1098.11 | 1364.67  | 8.27  |     | 399.03  | 11296.24 |
| 48 | NSF+ASP | 84 | f | 2+2 | 4 |   | yes | 124 | 141.08  | 5353.59  | 33.57 | 3   | 864.88  | 13456.99 |
| 49 | NSF+ASP | 85 | f | 2+2 | 4 |   | no  | 112 | 1372.64 | 18847.3  | 102.3 | 7   | 1306.38 | 6837.37  |
| 50 | NSF+ASP | 76 | f | 2+2 | 4 |   | no  | 115 | 188.86  | 14310.70 | 48.3  | 3   | 1333.93 | 6837.37  |
| 51 | NSF+ASP | 89 | f | 1+1 | 2 |   | yes | 102 | 1079.68 | 3681.50  | 17.7  | 3   | 709.92  | 4609.61  |
| 52 | NSF+ASP | 87 | f | 1+1 | 2 |   | yes | 117 | 184.14  | 7517.22  | 43.9  | 3   | 867.02  | 12539.07 |

*S1 indicates sacral vertebra I; S2, sacral vertebra II; mGycm, milligray-centimeter; 3D-/2D-, 3-dimensional-/2-dimensional-; sec, seconds; cc, cubic centimeter; NSF, navigation-assisted screw fixation; NSF+ASP, navigation-assisted screw fixation and additional sacroplasty*
